# Supplementary material for: The Variability of Age at First Marriage in the United States
Source: Research Square preprint supplement (doi:10.21203/rs.3.rs-7538029/v1), 2025-10-17
Supplement: Supplementary file 1 [file 3f750c1cbdd4f2bcc0590896.docx]

Appendix A. Comparisons of the Percentage of Three-year Range around the Median Age between the GSS and ACS

Appendix A1. Comparison of Average Age at the Time of Interviewing

|  | GSS | ACS |
| --- | --- | --- |
| 1915-19 | 63.95 | 94.11 |
| 1920-24 | 59.19 | 92.97 |
| 1925-29 | 54.35 | 89.96 |
| 1930-34 | 49.86 | 86.09 |
| 1935-39 | 44.89 | 81.67 |
| 1940-44 | 40.37 | 77.40 |
| 1945-49 | 35.84 | 72.74 |
| 1950-54 | 32.22 | 67.96 |
| 1955-59 | 29.64 | 63.16 |
| 1960-64 | 27.23 | 58.22 |

Table A-1. Individual Distance to the Median Age among Men between GSS and ACS Data (n=6,305,934)

| Birth cohort | Less than high school | |  | High school | |  | Some college | |  | College & above | |
| --- | --- | --- | --- | --- | --- | --- | --- | --- | --- | --- | --- |
| ACS | GSS |  | ACS | GSS |  | ACS | GSS |  | ACS | GSS |
| 1915-19 | 5.04  (26) | 3.76  (24) |  | 4.53  (26) | 3.36  (24) |  | 4.12  (26) | 2.00*  (21) |  | 4.02  (27) | 3.35  (25) |
| 1920-24 | 4.51  (24) | 3.46  (24) |  | 4.22  (24) | 2.98  (24) |  | 4.00  (25) | 2.68*  (24) |  | 3.91  (26) | 2.87  (24) |
| 1925-29 | 4.36  (23) | 3.23  (22) |  | 4.08  (23) | 3.11  (23) |  | 3.92  (24) | 2.74*  (23) |  | 3.77  (25) | 3.13  (25) |
| 1930-34 | 4.33  (23) | 2.97  (21) |  | 3.86  (23) | 2.76  (22) |  | 3.66  (23) | 4.09*  (25) |  | 3.63  (24) | 3.20  (25) |
| 1935-39 | 4.49  (22) | 2.67  (21) |  | 3.85  (22) | 2.81  (22) |  | 3.69  (23) | 3.65*  (23) |  | 3.53  (24) | 2.66  (24) |
| 1940-44 | 4.62  (22) | 2.43  (21) |  | 3.93  (22) | 2.67  (22) |  | 3.72  (23) | 2.21  (22) |  | 3.55  (24) | 2.48  (23) |
| 1945-49 | 4.84  (22) | 2.53  (21) |  | 4.16  (22) | 2.46  (21) |  | 4.01  (23) | 2.58  (23) |  | 3.94  (24) | 2.72  (23) |
| 1950-54 | 5.20  (22) | 2.57  (19) |  | 4.68  (23) | 2.50  (21) |  | 4.62  (24) | 2.87  (23) |  | 4.48  (25) | 3.07  (24) |
| 1955-59 | 5.52  (24) | 2.27  (19) |  | 4.94  (24) | 2.62  (21) |  | 4.80  (25) | 2.79  (22) |  | 4.44  (26) | 2.27  (24) |
| 1960-64 | 5.63  (25) | 1.83  (21) |  | 5.08  (25) | 2.23  (21) |  | 4.87  (26) | 1.95  (23) |  | 4.44  (27) | 2.43  (24) |

Notes: Median ages are in the parentheses; * means that the group has less than 30 cases.

Table A-2. Individual Distance to the Median Age among Women between GSS and ACS Data (n=7,431,391)

| Birth cohort | Less than high school | |  | High school | |  | Some college | |  | College & above | |
| --- | --- | --- | --- | --- | --- | --- | --- | --- | --- | --- | --- |
| ACS | GSS |  | ACS | GSS |  | ACS | GSS |  | ACS | GSS |
| 1915-19 | 5.66  (23) | 3.29  (19) |  | 5.04  (24) | 3.21  (22) |  | 4.64  (24) | 4.52*  (22) |  | 4.60  (25) | 3.08  (24) |
| 1920-24 | 5.07  (22) | 3.03  (19) |  | 4.34  (22) | 2.63  (21) |  | 4.02  (23) | 3.69*  (24) |  | 4.11  (24) | 2.84  (23) |
| 1925-29 | 4.55  (20) | 2.56  (19) |  | 3.87  (21) | 2.37  (20) |  | 3.68  (22) | 3.27*  (21) |  | 3.72  (23) | 2.77  (23) |
| 1930-34 | 4.62  (19) | 2.65  (18) |  | 3.57  (20) | 2.19  (20) |  | 3.40  (21) | 2.25*  (20) |  | 3.50  (22) | 2.77  (22) |
| 1935-39 | 4.78  (19) | 2.16  (18) |  | 3.53  (20) | 2.28  (20) |  | 3.38  (21) | 2.34*  (20) |  | 3.45  (22) | 2.34  (23) |
| 1940-44 | 5.16  (19) | 2.52  (18) |  | 3.68  (20) | 2.16  (20) |  | 3.51  (21) | 2.49*  (21) |  | 3.48  (22) | 2.57  (22) |
| 1945-49 | 5.36  (19) | 1.91  (17) |  | 3.82  (20) | 2.10  (20) |  | 3.69  (21) | 2.07  (20) |  | 3.69  (22) | 2.50  (22) |
| 1950-54 | 5.28  (19) | 1.98  (18) |  | 4.12  (20) | 2.12  (19) |  | 4.15  (21) | 2.26  (20) |  | 4.28  (23) | 2.81  (22) |
| 1955-59 | 5.62  (21) | 1.79  (17) |  | 4.58  (21) | 2.44  (19) |  | 4.49  (23) | 2.76  (22) |  | 4.38  (25) | 2.49  (23) |
| 1960-64 | 5.70  (22) | 1.98  (17) |  | 4.74  (22) | 2.30  (20) |  | 4.54  (23) | 2.01*  (22) |  | 4.28  (25) | 1.99  (23) |

Notes: Median ages are in the parentheses; * means that the group has less than 30 cases.

Appendix B. Explanation of Relative Ratio

The measure of the variability of age at first marriage adopted by Sweeney (2016) is designed to capture the relative ratio of the interquartile range to the median age at first marriage within a group. The formula used to calculate this measure is as follows:

(1)

where  represents the measure of the variability of age at first marriage in group . and refer to the value of the first and third quartiles, respectively, of age at first marriage within that group. donates the median age at first marriage in that group. For example, if the median age at first marriage within group is 24 years (), and the interquartile range (i.e., ) is six years. The variability of age at first marriage for that group would be 0.25 ().

Appendix C. Bivariate Analysis for Individual Distance to Median Age at First Marriage, by Birth Cohort, Gender, education, and race (n=13,737,325)

|  |  |  |  |  | Less than high school | High school | Some college | College & above |  | White | Black |
| --- | --- | --- | --- | --- | --- | --- | --- | --- | --- | --- | --- |
| Birth cohort |  | Men | Women |  |  |
| 1915-19 | 4.95* | 4.49 | 5.11* |  | 5.51* | 4.92* | 4.50 | 4.37* |  | 4.83* | 6.60* |
|  | (25) | (26) | (24) |  | (24) | (24) | (25) | (26) |  | (24) | (27) |
| 1920-24 | 4.35* | 4.17* | 4.43* |  | 4.90* | 4.31* | 4.01* | 4.02* |  | 4.22* | 6.33* |
|  | (23) | (25) | (22) |  | (23) | (23) | (23) | (25) |  | (23) | (25) |
| 1925-29 | 3.98* | 4.03* | 3.95* |  | 4.48* | 3.94* | 3.76* | 3.74* |  | 3.84* | 5.90* |
|  | (22) | (24) | (21) |  | (21) | (22) | (22) | (24) |  | (22) | (23) |
| 1930-34 | 3.74* | 3.84* | 3.68* |  | 4.41* | 3.67* | 3.50* | 3.57* |  | 3.59* | 5.53* |
|  | (22) | (23) | (21) |  | (21) | (21) | (22) | (23) |  | (22) | (23) |
| 1935-39 | 3.72* | 3.81* | 3.65* |  | 4.66* | 3.65* | 3.51* | 3.49* |  | 3.54* | 5.59* |
|  | (22) | (23) | (21) |  | (21) | (21) | (22) | (23) |  | (21) | (23) |
| 1940-44 | 3.78* | 3.83* | 3.74* |  | 4.92* | 3.78* | 3.60* | 3.51* |  | 3.59* | 5.63* |
|  | (22) | (23) | (21) |  | (21) | (21) | (22) | (23) |  | (22) | (23) |
| 1945-49 | 3.96* | 4.09* | 3.86* |  | 5.12 | 3.95* | 3.84* | 3.83* |  | 3.77* | 5.66* |
|  | (22) | (23) | (21) |  | (21) | (21) | (22) | (23) |  | (22) | (23) |
| 1950-54 | 4.42 | 4.62* | 4.24* |  | 5.24 | 4.37* | 4.37* | 4.38* |  | 4.23* | 5.86* |
|  | (23) | (24) | (22) |  | (21) | (21) | (22) | (24) |  | (22) | (24) |
| 1955-59 | 4.65* | 4.77* | 4.54* |  | 5.56* | 4.76 | 4.63* | 4.41* |  | 4.47* | 5.97* |
|  | (24) | (25) | (23) |  | (22) | (23) | (24) | (25) |  | (24) | (26) |
| 1960-64 | 4.70* | 4.84* | 4.57* |  | 5.66* | 4.91* | 4.69* | 4.36* |  | 4.54* | 5.88* |
|  | (25) | (26) | (24) |  | (24) | (24) | (24) | (26) |  | (25) | (27) |
| 1965-69 | 4.64* | 4.73* | 4.56* |  | 5.57* | 4.93* | 4.66* | 4.29* |  | 4.49* | 5.59* |
|  | (26) | (27) | (25) |  | (25) | (25) | (25) | (27) |  | (25) | (28) |
| 1970-74 | 4.41 | 4.48 | 4.34 |  | 5.17 | 4.75 | 4.45 | 4.08 |  | 4.29 | 5.10 |
|  | (26) | (27) | (25) |  | (25) | (25) | (25) | (27) |  | (26) | (28) |

Note: Median ages in parentheses. * p<0.05, compared to the 1970-74 cohort within each social group.

Appendix D. Marginal Estimates of Individual Distance to Median Age at First Marriage by Birth Cohort, Gender, Education, and Race

|  | Non-Hispanic White women | | | |  | Black women | | | |
| --- | --- | --- | --- | --- | --- | --- | --- | --- | --- |
| Birth cohort | Less than high school | High school | Some college | College & above |  | Less than high school | High school | Some college | College & above |
| 1915-19 | 5.50a | 4.65ac | 4.49ac | 4.43ac |  | 7.60ad | 6.75acd | 6.58acd | 6.52acd |
| 1920-24 | 5.00 | 4.15c | 3.98c | 3.93c |  | 7.09d | 6.24cd | 6.08cd | 5.91cd |
| 1925-29 | 4.48a | 3.63ac | 3.46ac | 3.41ac |  | 6.57ad | 5.72acd | 5.56acd | 5.50acd |
| 1930-34 | 4.16a | 3.30ac | 3.14ac | 3.08ac |  | 6.25ad | 5.40acd | 5.24acd | 5.18acd |
| 1935-39 | 4.19a | 3.34ac | 3.18ac | 3.12ac |  | 6.29ad | 5.43acd | 5.27acd | 5.21acd |
| 1940-44 | 4.31a | 3.46ac | 3.30ac | 3.24ac |  | 6.41ad | 5.56acd | 5.40acd | 5.34acd |
| 1945-49 | 4.50a | 3.65ac | 3.49ac | 3.43ac |  | 6.60ad | 5.75acd | 5.58acd | 5.53acd |
| 1950-54 | 5.00 | 4.15c | 3.98c | 3.92c |  | 7.09d | 6.24cd | 6.08cd | 6.02cd |
| 1955-59 | 5.31a | 4.46ac | 4.30ac | 4.24ac |  | 7.41ad | 6.55acd | 6.39acd | 6.33acd |
| 1960-64 | 5.35a | 4.50ac | 4.33ac | 4.28ac |  | 7.44ad | 6.59acd | 6.43acd | 6.37acd |
| 1965-69 | 5.27a | 4.40ac | 4.24ac | 4.18ac |  | 7.35ad | 6.50acd | 6.34acd | 6.28acd |
| 1970-74 | 4.89 | 4.04c | 3.88c | 3.82c |  | 6.99d | 6.14cd | 5.97cd | 5.92cd |
|  | Non-Hispanic White men | | | |  | Black men | | | |
| 1915-19 | 5.40a | 5.00abc | 4.83abc | 4.60abc |  | 6.99abd | 6.59abcd | 6.42abcd | 6.19abcd |
| 1920-24 | 4.90 | 4.49bc | 4.32bc | 4.10bc |  | 6.49bd | 6.08bcd | 5.91bcd | 5.68bcd |
| 1925-29 | 4.38a | 3.97abc | 3.80abc | 3.58abc |  | 5.97abd | 5.56abcd | 5.39abcd | 5.16abcd |
| 1930-34 | 4.06a | 3.65abc | 3.48abc | 3.25abc |  | 5.65abd | 5.24abcd | 5.07abcd | 4.84abcd |
| 1935-39 | 4.09a | 3.69abc | 3.52abc | 3.29abc |  | 5.68abd | 5.28abcd | 5.11abcd | 4.88abcd |
| 1940-44 | 4.22a | 3.81abc | 3.64abc | 3.41abc |  | 5.80abd | 5.40abcd | 5.23abcd | 5.00abcd |
| 1945-49 | 4.40a | 4.00abc | 3.83abc | 3.60abc |  | 5.99abd | 5.59abcd | 5.42abcd | 5.19abcd |
| 1950-54 | 4.90 | 4.49bc | 4.32bc | 4.10bc |  | 6.49bd | 6.08bcd | 5.91bcd | 5.68bcd |
| 1955-59 | 5.21a | 4.81abc | 4.64abc | 4.41abc |  | 6.80abd | 6.40abcd | 6.23abcd | 6.00abcd |
| 1960-64 | 5.25a | 4.84abc | 4.67abc | 4.45abc |  | 6.84abd | 6.43abcd | 6.26abcd | 6.03abcd |
| 1965-69 | 5.16a | 4.75abc | 4.58abc | 4.35abc |  | 6.75abd | 6.34abcd | 6.17abcd | 5.94abcd |
| 1970-74 | 4.80 | 4.39bc | 4.22bc | 3.99bc |  | 6.38bd | 5.98bcd | 5.81bcd | 5.58bcd |

Notes: The marginal individual distances to median age at first marriage are estimated based on the estimates of Model 6 in Table 3. a specifies a significant difference between the birth cohort and the 1970-74 cohort at a 95-percent confidence interval under the same gender, education level, and racial group; b specifies a significant gender difference at a 95-percent confidence interval under the same birth cohort, education level, racial group; c specifies a significant difference between the education level and less than high school at a 95-percent confidence interval under the same birth cohort, gender, and racial group; d specifies a significant racial difference at a 95-percent confidence interval under the same birth cohort, gender, and education level. The tests are based on Wald tests.

Appendix E. Unemployment Rates from Census Data

The information on unemployment rates is extracted from the Census data on IPUMs, which includes the 1940 1-percent Census data, the 1950 1-percent Census data, the 1960 5-percent Census data, the 1970 1-percent Census state sample (Form 2)[[1]](#footnote-1), the 1980 5-percent Census data, the 1990 5-percent Census state data, and the 2000 5-percent Census data. We restricted the sample to men and women aged between twenty and forty, and they were categorized as either non-Hispanic White or Black in the Census data. The original sample size for estimating unemployment rates is 15,032,806.

The unemployment rate is defined as the rate of unemployed individuals to all individuals in the labor market (including both employed and unemployed individuals) in the Census data. Individuals not in the labor force are excluded from our estimation. This information is extracted from the variable ‘empstat.’

Appendix E-1. Unemployment Rates (%), By Census Year, Gender, and Race

| Census year | Non-Hispanic White men | Non-Hispanic White women | Black men | Black women |
| --- | --- | --- | --- | --- |
| 1940 | 9.0 | 7.7 | 10.7 | 10.7 |
| 1950 | 3.4 | 3.1 | 6.9 | 7.0 |
| 1960 | 4.0 | 5.0 | 8.6 | 9.7 |
| 1970 | 3.3 | 4.9 | 6.4 | 8.9 |
| 1980 | 6.0 | 5.5 | 12.7 | 12.3 |
| 1990 | 5.1 | 4.8 | 13.9 | 13.5 |
| 2000 | 4.3 | 4.3 | 12.4 | 11.8 |

Considering that the census data only provides unemployment rates for census years, we interpolated the values of every intervening year. For example, we used the unemployment rates of 1940 and 1950 to interpolate the yearly values between 1941 and 1949.

After conducting interpolations, we used the median age at first marriage, derived from each birth cohort and categorized by gender and race in the ACS data, to estimate the average unemployment rates during the time men and women were entering into marriage. For example, the median age at first marriage for non-Hispanic White women born between 1920 and 1924 is 22 years. This suggests they generally entered into marriage between 1942 (=1920 + 22) and 1946 (= 1924 + 24). With this information, we estimated the average unemployment rate between 1940 and 1946 for these women and regarded it as the economic prospect they experienced while entering marriage.

Appendix E2. Unemployment Rates at the Median Age at First Marriage among non-Hispanic White Women

| Birth cohort | Median age at first marriage | Lower bound of the year for median age | Upper bound of the year for median age | Average unemployment rates |
| --- | --- | --- | --- | --- |
| 1915-19 | 24 | 1939 | 1943 | 7.01a |
| 1920-24 | 22 | 1942 | 1946 | 8.78 |
| 1925-29 | 21 | 1946 | 1950 | 6.94 |
| 1930-34 | 21 | 1951 | 1955 | 5.29 |
| 1935-39 | 20 | 1955 | 1959 | 6.05 |
| 1940-44 | 21 | 1961 | 1965 | 6.99 |
| 1945-49 | 21 | 1966 | 1970 | 6.94 |
| 1950-54 | 21 | 1971 | 1975 | 6.96 |
| 1955-59 | 23 | 1978 | 1982 | 7.38 |
| 1960-64 | 23 | 1983 | 1987 | 7.29 |
| 1965-69 | 24 | 1989 | 1993 | 6.87 |
| 1970-74 | 25 | 1995 | 1999 | 6.55 |

Note: a the unemployment rate is estimated by the unemployment rates of 1940, 1941, 1942, and 1943.

Appendix E3. Unemployment Rates at the Median Age at First Marriage among non-Hispanic White Men

| Birth cohort | Median age at first marriage | Lower bound of the year for median age | Upper bound of the year for median age | Average unemployment rates |
| --- | --- | --- | --- | --- |
| 1915-19 | 26 | 1941 | 1945 | 10.44 |
| 1920-24 | 25 | 1945 | 1949 | 8.20 |
| 1925-29 | 24 | 1949 | 1953 | 5.96 |
| 1930-34 | 23 | 1953 | 1957 | 5.58 |
| 1935-39 | 23 | 1958 | 1962 | 5.88 |
| 1940-44 | 23 | 1963 | 1967 | 5.79 |
| 1945-49 | 23 | 1968 | 1972 | 5.44 |
| 1950-54 | 24 | 1974 | 1978 | 6.38 |
| 1955-59 | 25 | 1980 | 1984 | 8.00 |
| 1960-64 | 26 | 1986 | 1990 | 7.46 |
| 1965-69 | 26 | 1991 | 1995 | 7.02 |
| 1970-74 | 27 | 1997 | 2001 | 4.42a |

Note: a the unemployment rate is estimated by the unemployment rates of 1997, 1998, 1999, and 2000.

Appendix E4. Unemployment Rates at the Median Age at First Marriage among Black Women

| Birth cohort | Median age at first marriage | Lower bound of the year for median age | Upper bound of the year for median age | Average unemployment rates |
| --- | --- | --- | --- | --- |
| 1915-19 | 26 | 1941 | 1945 | 12.33 |
| 1920-24 | 24 | 1944 | 1948 | 11.22 |
| 1925-29 | 23 | 1948 | 1952 | 9.74 |
| 1930-34 | 22 | 1952 | 1956 | 9.54 |
| 1935-39 | 22 | 1957 | 1961 | 10.89 |
| 1940-44 | 22 | 1962 | 1966 | 11.54 |
| 1945-49 | 22 | 1967 | 1971 | 11.14 |
| 1950-54 | 23 | 1973 | 1977 | 11.92 |
| 1955-59 | 25 | 1980 | 1984 | 14.30 |
| 1960-64 | 26 | 1986 | 1990 | 15.02 |
| 1965-69 | 27 | 1992 | 1996 | 15.16 |
| 1970-74 | 27 | 1997 | 2001 | 12.06a |

Note: a the unemployment rate is estimated by the unemployment rates of 1997, 1998, 1999, and 2000.

Appendix E5. Unemployment Rates at the Median Age at First Marriage among Black Men

| Birth cohort | Median age at first marriage | Lower bound of the year for median age | Upper bound of the year for median age | Average unemployment rates |
| --- | --- | --- | --- | --- |
| 1915-19 | 28 | 1943 | 1947 | 11.56 |
| 1920-24 | 26 | 1946 | 1950 | 10.42 |
| 1925-29 | 25 | 1950 | 1954 | 8.90 |
| 1930-34 | 25 | 1955 | 1959 | 9.75 |
| 1935-39 | 25 | 1960 | 1964 | 10.60 |
| 1940-44 | 24 | 1964 | 1968 | 9.72 |
| 1945-49 | 24 | 1969 | 1973 | 8.62 |
| 1950-54 | 25 | 1975 | 1979 | 11.55 |
| 1955-59 | 27 | 1982 | 1986 | 14.94 |
| 1960-64 | 28 | 1988 | 1992 | 15.66 |
| 1965-69 | 29 | 1994 | 1998 | 15.30 |
| 1970-74 | 29 | 1999 | 2003 | 12.48a |

Note: a the unemployment rate is estimated by the unemployment rates of 1999 and 2000.

9 Table 3. OLS Regression Models for Individual Distance to Median Age at First Marriage (n=13,737,325)

|  |  |
| --- | --- |
| Birth cohort (Ref. = 1970-74) |  |
| 1915-19 | 0.61*** |
|  | (0.12) |
| 1920-24 | 0.10 |
|  | (0.12) |
| 1925-29 | -0.42*** |
|  | (0.09) |
| 1930-34 | -0.74*** |
|  | (0.08) |
| 1935-39 | -0.70*** |
|  | (0.07) |
| 1940-44 | -0.58*** |
|  | (0.07) |
| 1945-49 | -0.39*** |
|  | (0.08) |
| 1950-54 | 0.10 |
|  | (0.11) |
| 1955-59 | 0.42*** |
|  | (0.08) |
| 1960-64 | 0.45*** |
|  | (0.08) |
| 1965-69 | 0.36*** |
|  | (0.09) |
| Male | -0.34*** |
|  | (0.05) |
| Education level (Ref.= College & above) |  |
| Less than high school | 1.07*** |
|  | (0.09) |
| High school | 0.22** |
|  | (0.07) |
| Some college | 0.06 |
|  | (0.05) |
| Non-Hispanic White | -2.09*** |
|  | (0.19) |
| Male*Less than high school | -0.27** |
|  | (0.08) |
| Male*High school | 0.18** |
|  | (0.06) |
| Male*Some college | 0.17** |
|  | (0.06) |
| Male*Non-Hispanic White | 0.51*** |
|  | (0.05) |
| Unemployment rates | -0.08*** |
|  | (0.02) |
| Constant | 6.52*** |
|  | (0.30) |
| R-squared | 0.02 |

Notes: Standard errors in parentheses; *** p<0.001, ** p<0.01, * p<0.05.

1. The difference between Form 1 and 2 is that the former is originally called the “5% state sample” because Form 1 was given to 5% of the population, and the latter is originally called the “15% state sample” because Form 2 was given to 15% of the population. [↑](#footnote-ref-1)
